# Supplementary material
Source: PubMed Central journal article supplement (PMC1533958)
Supplement: plntphys_pp.106.082826_1.pdf [file plntphys_pp.106.082826_1.pdf]

## SUPPLEMENTAL FIGURE LEGEND

**Supplemental Figure 1.** Methylation interference experiments of RISBZ1 and RPBF binding to promoters of seed storage protein genes. DNA fragments corresponding to *GluB-1* (-199 to -155, -140 to -80 and -110 to -42), *NRP33* (-386 to -276, -295 to -172 and -188 to -91) and *Glb-1* (-340 to -228, -245 to -122 and -137 to -29) were labeled on both strands (Top and Bottom). Both strands were partially methylated and incubated with GST-RISBZ1 or GST-RPBF. Free (F) and retarded (S) protein-DNA complex fragments were separated by polyacrylamide gel electrophoresis. Fragments were eluted from the gel, chemically digested with piperidine and separated on a sequencing gel in parallel with the sequencing ladder of this fragment. G residues, which are protected by RISBZ1 (larger circle) and RPBF (larger arrowhead), are indicated. G residues partially protected by RISBZ1 (smaller circle) and RPBF (smaller arrowhead) are also indicated.
